# Supplementary material
Source: PubMed Central journal article supplement (PMC1322251)
Supplement: bmj_331_7531_1517__1.pdf [file bmj_331_7531_1517__1.pdf]

| Minute           | Description                                                                                                                              | Coding                                |
|------------------|------------------------------------------------------------------------------------------------------------------------------------------|---------------------------------------|
| <b>Episode 1</b> |                                                                                                                                          |                                       |
| 8                | Nanny tells Jack he cannot watch movie about marijuana use                                                                               | Drug, verbal rejection                |
| 11               | Viewers see photo of Ozzy holding a cigarette                                                                                            | Tobacco, visual endorsement           |
| 12               | Ozzy is holding something in his hand that looks like it may be a little cigar                                                           | Tobacco, visual endorsement           |
|                  | A friend is seen smoking outside the house                                                                                               | Tobacco, visual endorsement           |
|                  | Ozzy is holding something in his hand that looks like it may be a little cigar                                                           | Tobacco, visual endorsement           |
| 16               | Ozzy sees cigarette pack on table and becomes upset, holds it up to camera and explains to audience how harmful and addictive tobacco is | Tobacco, visual and verbal rejection  |
| 17               | Ozzy tells kids not to drink or use drugs that evening when they go out                                                                  | Alcohol and drugs, verbal rejection   |
| <b>Episode 2</b> |                                                                                                                                          |                                       |
| 10               | Sharon advises Kelly to not drink that evening when she goes out                                                                         | Alcohol, verbal rejection             |
|                  | Kelly explains she won't be drinking because she is the designated driver                                                                | Alcohol, verbal rejection             |
| <b>Episode 3</b> |                                                                                                                                          |                                       |
| 6                | A marijuana leaf patch is seen on sleeve of Kelly's jacket                                                                               | Drugs, visual endorsement             |
| 13               | Martini glasses and shaker are seen in background three times                                                                            | Alcohol, visual endorsement           |
| 15               | Sharon is holding wine bottle                                                                                                            | Alcohol, visual endorsement           |
| 17               | Sharon complains of cigarette butts left in their yard after party                                                                       | Tobacco, verbal rejection             |
|                  | Ozzy agrees the butts are disgusting                                                                                                     | Tobacco, verbal rejection             |
| <b>Episode 4</b> |                                                                                                                                          |                                       |
| 4                | Wine on kitchen counter                                                                                                                  | Alcohol, visual endorsement           |
| 7                | Sharon criticises neighbours for drinking and loud behavior every night                                                                  | Alcohol, verbal rejection             |
| 9                | Neighbours are seen drinking wine                                                                                                        | Alcohol, visual endorsement           |
|                  | Jack is wearing shirt that says "cocaine"                                                                                                | Drugs, visual endorsement             |
| <b>Episode 5</b> |                                                                                                                                          |                                       |
| 0                | Wine on kitchen counter                                                                                                                  | Alcohol, visual endorsement           |
| 2                | Sharon explains on telephone that Santa (at a concert) will be smoking and will look like he uses heroin                                 | Tobacco and drugs, verbal endorsement |
| 15               | Santa statue is on a cross holding a bottle of liquor                                                                                    | Alcohol, visual endorsement           |
| 19               | Ozzy is seen drinking wine                                                                                                               | Alcohol, visual endorsement           |
| <b>Episode 6</b> |                                                                                                                                          |                                       |
| 1                | Kelly tells story of tripping and feeling embarrassed, describes feeling like a "crackhead"                                              | Drugs, verbal rejection               |
| 6                | Sharon acknowledges that she and Ozzy know about Jack's drug use                                                                         | Drugs, verbal endorsement             |

- 13 Jack sarcastically states his plans for the evening are to use drugs  
 16 Ozzy is holding something in his hand that looks like it may be a cigarette  
 17 Kelly explains she won't use her fake ID to by alcohol  
 18 Ozzy explains that if she gets caught, "it's over"  
 Kelly states that she does not do drugs  
 19 Ozzy states that he will not have drugs used in his home  
 Jack asserts that he drinks and uses drugs by choice, not because he is addicted  
 Ozzy explains he used to drink and do drugs and found they were very addictive  
 Jack claims that the majority of the population uses drugs  
 Kelly reminds Jack of his statement that he smokes marijuana every day

### Episode 7

- 1 Ozzy says he's on so much medication that he should not drink any alcohol  
 2 Ozzy pours a glass of wine and drinks entire quantity in one gulp  
 Sharon describes Ozzy as being drunk  
 3 Wine on kitchen counter  
 16 There appears to be a glass of wine in front of Ozzy during an interview  
 20 There is a glass of wine on the table

### Episode 8

- 2 Friend is seen smoking outside the house  
 5 Friend is asked by Jack about drinking; he acknowledges drinking, but that he is not drunk yet  
 6 After Kelly explains she is going to a friend's, Jack asks if the friend is drunk or high  
 8 Sharon finds a bottle of liquor and marijuana in Jack's room  
 Sharon explains that she is going to urinate in the liquor bottle  
 Sharon takes liquor bottle into bathroom, scene with Kelly ensues at bathroom door, bottle is discarded in trash

- 9 Kelly references when Sharon once defecated in a bag of Ozzy's marijuana  
 Friend explains that the liquor was his  
 Sharon explains to friend that she tried to urinate in liquor bottle  
 11 Friend is seen smoking outside the house  
 14 Friend is seen smoking outside the house  
 17 Friend holds cigarette and exhales smoke while talking to Kelly about his going outside to smoke  
 19 Wine on kitchen counter  
 20 Friend is holding a cigarette

### Episode 9

- Drugs, verbal endorsement  
 Tobacco, visual endorsement  
 Alcohol, verbal rejection  
 Alcohol, verbal rejection  
 Drugs, verbal rejection  
 Drugs, verbal rejection  
 Alcohol and drugs, verbal endorsement  
 Alcohol and drugs, verbal rejection  
 Drugs, verbal endorsement  
 Drugs, verbal endorsement  
 Alcohol, verbal rejection  
 Alcohol, visual endorsement  
 Alcohol, verbal endorsement  
 Alcohol, visual endorsement  
 Alcohol, visual endorsement  
 Alcohol, visual endorsement  
 Tobacco, visual endorsement  
 Alcohol, verbal endorsement  
 Alcohol and drugs, verbal endorsement  
 Alcohol and drugs, visual endorsement  
 by Jack  
 Alcohol, verbal rejection  
 Alcohol, visual rejection (Sharon)  
 Drugs, verbal rejection (Sharon)  
 Alcohol, verbal endorsement  
 Alcohol, verbal rejection  
 Tobacco, visual endorsement  
 Tobacco, visual endorsement  
 Tobacco, verbal and visual endorsement  
 Alcohol, visual endorsement  
 Tobacco, visual endorsement

- 0 Upon hearing that their driver was in an accident, Ozzy assumes he was drunk or using drugs Alcohol and drugs, verbal rejection
- 11 Sharon is having champagne poured for her Alcohol, visual endorsement
- Ozzy opens a bottle of champagne and hands to Kelly Alcohol, visual endorsement
- Friend pours glass of champagne for self Alcohol, visual endorsement
- Friend requests glass of champagne Alcohol, verbal endorsement
- 12 Friend requests glass of champagne Alcohol, verbal endorsement
- 14 Friend pours glass of wine and raises glass to drink Alcohol, visual endorsement
- Friend tells story of another friend who's in trouble for getting caught with marijuana Drugs, verbal rejection
- Kelly alludes to previous use of marijuana Drugs, verbal endorsement
- 15 Kelly explains Sharon's negative response to learning that Kelly used marijuana Drugs, verbal rejection (Sharon)
- 17 Jack is wearing shirt that says "cocaine" Drugs, visual endorsement
- 18 Ozzy advises Jack to not go out wearing shirt that says "cocaine" Drugs, verbal rejection
- Sharon is concerned that Jack's appearance (including "cocaine" shirt) could get him arrested Drugs, verbal rejection

### Episode 10

- 8 Ozzy remembers being a kid that drank and did drugs and now wonders what was wrong with him Alcohol and drugs, verbal rejection
- 11 Kelly asks Sharon if she is drunk, because she can tell a difference Alcohol, verbal rejection
- Ozzy confirms that Sharon is drunk Alcohol, verbal endorsement
- 17 Ozzy explains he is not proud of having been a drug addict and alcoholic Alcohol and drugs, verbal rejection
- 19 Ozzy tells kids not to drink or use drugs that evening when they go out Alcohol and drugs, verbal rejection
- Ozzy explains he shouldn't be drinking alcohol at all Alcohol, verbal rejection
- Ozzy pours a glass of wine and drinks entire quantity in one gulp Alcohol, visual endorsement
- 20 Ozzy opens a bottle of champagne and hands to Kelly Alcohol, visual endorsement
- Wine on kitchen counter
